# Supplementary material for: Source of Raw Materials and Its Processing for the Manufacturing of Ptolemaic Faience Bowls from Tell Atrib (Nile Delta, Egypt)
Source: MDPI journal article supplement (doi:10.3390/ma15186251), 2022-09-08
Supplement: s1 [file s1]

| Lab no.     | Size (µm)     | Shape  | Roundness | Sharpness | Cavities                 | Cracks      |
|-------------|---------------|--------|-----------|-----------|--------------------------|-------------|
| <b>NZA</b>  | <50 +++       | EL +   | VA ++     | EG +      | +<br>oval                | +++ outline |
|             | >50 +         | AN +++ | A +++     | CO +      |                          | + across    |
|             |               | IS ++  | S-A ++    | JG ++     |                          |             |
| <b>B37</b>  | <50 +++       | EL +   | VA +++    | EG +++    | ++<br>oval               | + outline   |
|             | >50 +         | AN +++ | A +       | CO +++    |                          | ++ across   |
|             |               | IS ++  | S-A –     | JG +      |                          |             |
| <b>B9.1</b> | <50 + thicker | EL +   | VA ++     | EG ++     | ++<br>oval               | ++ outline  |
|             | >50 +++       | AN +++ | A ++      | CO ++     |                          | + across    |
|             | >100 +        | IS ++  | S-A +     | JG +      |                          |             |
| <b>B9.2</b> | <50/>50       | EL +   | VA ++     | EG +      | ++<br>oval<br>triangular | ++ outline  |
|             |               | AN +++ | A +++     | CO ++     |                          | + across    |
|             |               | IS ++  | S-A +     | JG +      |                          |             |
| <b>MS</b>   | <50 + thicker | EL +   | VA +      | EG +      | +<br>oval<br>triangular  | – outline   |
|             | >50 +++       | AN +++ | A ++      | CO +      |                          | + across    |
|             | >100 +        | IS ++  | S-A +++   | JG –      |                          |             |
| <b>B100</b> | <50 +         | EL +   | VA +      | EG –      | +<br>oval<br>triangular  | +++ outline |
|             | >50 +++       | AN +++ | A ++      | CO +      |                          | + across    |
|             | >100 +        | IS ++  | S-A +     | JG ++     |                          |             |
| <b>B81</b>  | < 50/>50      | EL +   | VA ++     | EG +      | +<br>oval<br>triangular  | ++ outline  |
|             |               | AN +++ | A +++     | CO ++     |                          | + across    |
|             |               | IS ++  | S-A +     | JG +      |                          |             |

qualitative analysis: +++ high, ++ medium, + low, / similar, – no; EL – elongated, AN – anisometric, IS – isometric; VA – very angular, A – angular, S-A – sub-angular, EG – edges, CO – corners, JG – jagged
