# Supplementary material for: Source of Raw Materials and Its Processing for the Manufacturing of Ptolemaic Faience Bowls from Tell Atrib (Nile Delta, Egypt)
Source: MDPI journal article supplement (doi:10.3390/ma15186251), 2022-09-08
Supplement: s1 [file s1]

| Size class<br>ø [mm] | Size range<br>ø [mm] | Lab no. |      |      |      |      |      |      |      |      |      |      |      |      |      |
|----------------------|----------------------|---------|------|------|------|------|------|------|------|------|------|------|------|------|------|
|                      |                      | NZA     |      | B37  |      | B9.1 |      | B9.2 |      | MS   |      | B100 |      | B81  |      |
| Mass content [%]     |                      |         |      |      |      |      |      |      |      |      |      |      |      |      |      |
| Sand<br>2.0 – 0.05   | 0.3 – 0.2            |         |      |      |      |      |      |      |      |      |      |      |      |      |      |
|                      | 0.2 – 0.1            | 27.4    | 4.8  | 29.4 | 3.6  | 65.5 | 26.9 | 56.9 | 27.0 | 72.6 | 25.6 | 79.1 | 36.5 | 56.6 | 22.4 |
|                      | 0.1 – 0.07           |         | 8.7  |      | 9.4  |      | 13.2 |      | 15.2 |      | 17.6 |      | 19.2 |      | 16.5 |
|                      | 0.07 – 0.05          |         | 13.9 |      | 16.4 |      | 13.7 |      | 14.7 |      | 19.9 |      | 13.7 |      | 17.8 |
| Silt<br>0.05 – 0.002 | 0.05 – 0.04          |         | 13.2 |      | 9.9  |      | 8.8  |      | 9.0  |      | 9.2  |      | 6.6  |      | 10.7 |
|                      | 0.04 – 0.03          |         | 17.7 |      | 15.7 |      | 9.8  |      | 10.5 |      | 8.8  |      | 5.6  |      | 10.0 |
|                      | 0.03 – 0.02          |         | 19.7 |      | 17.9 |      | 9.1  |      | 12.1 |      | 6.0  |      | 4.9  |      | 10.8 |
|                      | 0.02 – 0.01          | 72.6    | 18.6 | 70.5 | 19.9 | 34.5 | 5.9  | 43.1 | 9.4  | 27.4 | 2.9  | 20.9 | 3.0  | 43.4 | 9.5  |
|                      | 0.01– 0.007          |         | 2.1  |      | 3.9  |      | 0.6  |      | 1.4  |      | 0.3  |      | 0.4  |      | 1.7  |
|                      | 0.007 – 0.005        |         | 0.8  |      | 1.9  |      | 0.2  |      | 0.5  |      | 0.1  |      | 0.2  |      | 0.6  |
|                      | 0.005 – 0.002        |         | 0.5  |      | 1.3  |      | 0.1  |      | 0.3  |      | 0.1  |      | 0.2  |      | 0.2  |
| Clay<br><0.002       | 0.002 – 0.001        | 0.0     | 0.0  | 0.1  | 0.1  | 0.0  | 0.0  | 0.0  | 0.0  | 0.0  | 0.0  | 0.0  | 0.0  | 0.0  | 0.0  |
|                      | 0.001 – 0.000        |         | 0.0  |      | 0.0  |      | 0.0  |      | 0.0  |      | 0.0  |      | 0.0  |      |      |
